# Supplementary material for: An IrRuOx catalyst supported by oxygen-vacant Ta oxide for the oxygen evolution reaction and proton exchange membrane water electrolysis
Source: Royal Society of Chemistry journal article supplement (doi:10.1039/d3nr06211b), 2024-01-01
Supplement: d3nr06211b1.pdf [file d3nr06211b1.pdf]

*Electronic Supplementary Information*

**IrRuO<sub>x</sub> catalyst supported by oxygen-vacant Ta oxide for oxygen evolution reaction and proton exchange membrane water electrolysis**

Yanrong Liu <sup>a, b, c</sup>, Meiqi Zhang <sup>c</sup>, Cong Zhang <sup>d</sup>, Honghua Zhang <sup>c</sup>, Hao Wang <sup>a, b, c</sup> \*

<sup>a</sup> *Beijing Key Laboratory of Ionic Liquids Clean Process, CAS Key Laboratory of Green Process and Engineering, State Key Laboratory of Multiphase Complex Systems, Institute of Process Engineering, Chinese Academy of Sciences, Beijing 100190, China.*

<sup>b</sup> *School of Chemical Engineering, University of Chinese Academy of Sciences, Beijing 100049, China*

<sup>c</sup> *Longzihu New Energy Laboratory, Zhengzhou Institute of Emerging Industrial Technology, Henan University, Zhengzhou 450000, China.*

<sup>d</sup> *SINOPEC Research Institute of Petroleum Processing Co., Ltd., Beijing 100083, China.*

\* *Corresponding author (H. Wang), Email: haowang@ipe.ac.cn*

## **S1. Other experimental details**

### *S1.1 X-ray absorption characterizations*

Ta L3-edge analysis was performed with Si(111)(crystal monochromators at the BL11B beamlines at the Shanghai Synchrotron Radiation Facility (SSRF) (Shanghai, China). Before the analysis at the beamline samples were pressed into thin sheets with 1 cm in diameter and sealed using Kapton tape film. The XAFS spectra were recorded at room temperature using a 4-channel Silicon Drift Detector (SDD) Bmker 5040. Ta L3-edge extended X-ray absorption fine structure (EXAFS) spectra were recorded in transmission mode. Negligible changes in the line-shape and peak position of Ta L3-edge XANES spectra were observed between two scanstaken for a specific sample. The XAFS spectra of these standard samples (For example Ta-foil and Ta<sub>2</sub>O<sub>5</sub>) were recorded in transmission mode. The spectra were processed and analyzed by the software codes Athena and Artemis.

### *S1.2 Half-cell electrochemical measurements*

The OER performance was evaluated using a conventional three-electrode system connected by a PARSTAT electrochemical workstation (3000-DX, USA). To prepare the catalyst ink, 6 mg of the catalyst was ultrasonically dispersed in a mixed solution with a DI water/ethanol/Nafion (5 wt%) volume ratio of 15/35/4. The catalyst loading was controlled by the amount of ink dropped on the electrode surface. Electrochemical tests were performed in a conventional three-electrode system at room temperature in a 0.5 M H<sub>2</sub>SO<sub>4</sub> electrolyte solution. A KCl-saturated Ag-AgCl electrode and a platinum sheet served as the reference and counter electrodes, respectively. All the potentials discussed below were calibrated to a reversible hydrogen electrode (RHE). To assess the OER catalytic activity of the studied samples, linear sweep voltammetry (LSV) was conducted at a scanning rate of 5 mV s<sup>-1</sup> in a potential range of 1.2 – 2.0 V vs. RHE. The catalytic stability of the samples was tested by chronopotentiometry, and the current density was fixed at 10 mA cm<sup>-2</sup>. Potentiostatic electrochemical impedance spectroscopy (EIS) was recorded in a frequency range of 10 kHz – 0.1 Hz at a potential

of 1.5 V vs. RHE. CV curves were recorded within the potential range of 0.624 V to 0.724 V vs. RHE, and five scanning speeds were chosen, including 20, 40, 60, 80, and 100  $\text{mV s}^{-1}$ . The current densities taken from the middle of the curves during the charging processes were plotted as a function of the scanning rates, and the resulting slopes were  $C_{\text{DL}}$ . The catalytic stability of the samples was tested by chronopotentiometry, and the current density was fixed at 10  $\text{mA cm}^{-2}$ .

### *S1.3 Single-cell PEMWE measurements*

To evaluate the PEMWE performance of the studied samples, a catalyst-coated membrane (CCM) was prepared by ultrasonically spraying the anode catalyst ink and cathode catalyst ink on each side of a proton exchange membrane. To make the catalyst ink, the catalyst was dispersed into a solution containing isopropanol, deionized water, and Nafion solution (5 wt%), and the mixture was ultrasonicated over 40 min to form a uniform solution. In the catalyst ink, the dry ionomer to catalyst (I/C) ratio was 0.9 for cathode and 0.124 for anode. For all the single-cell experiments, 60wt% Pt/C (Johnson Matthey, UK) served as the cathode catalyst. The final catalyst loading on the CCM was 0.3  $\text{mg}_{\text{Ir}} \text{cm}^{-2}$  on the anode and 0.2  $\text{mg}_{\text{Pt}} \text{cm}^{-2}$  on the cathode as determined by an X-ray fluorescence spectrometer (HITACHI, Japan). The CCM was assembled with a carbon gas diffusion layer (GDL) on the cathode and a Ti felt porous transport layer (PTL) on the anode to finally form the membrane electrode assembly (MEA) in the electrolyzer. The single cell was maintained at 80 °C, and a flow of 80 °C water was supplied to the anode with a flow rate of 50  $\text{mL min}^{-1}$ . The single cell was connected to a Gamry electrochemical workstation (Reference 3000, USA) equipped with a current booster (Reference 30K, USA) to record electrochemical data. Prior to testing the polarization curves, MEA was activated using 100  $\text{mA cm}^{-2}$  for 8 h. Galvanostatic EIS was recorded in a frequency range of 1 MHz –1 Hz at a current density of 100  $\text{mA cm}^{-2}$ . The catalytic stability of the MEAs was tested by chronopotentiometry, and the current density was fixed at 500  $\text{mA cm}^{-2}$ .

## S2. SEM images and elemental mapping for RuO<sub>x</sub>/Ta<sub>2</sub>O<sub>5</sub> and IrO<sub>x</sub>/Ta<sub>2</sub>O<sub>5</sub>

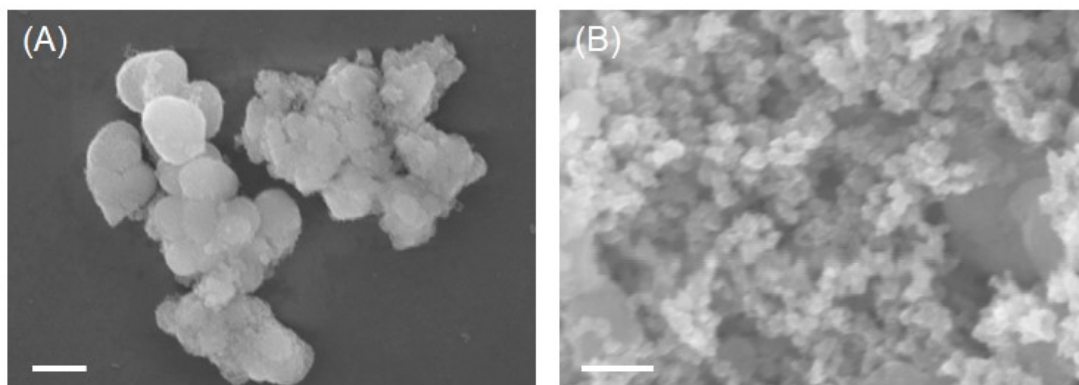

**Fig. S1** SEM images of (A) Ta<sub>2</sub>O<sub>5</sub> and (B) IrRuO<sub>x</sub>/Ta<sub>2</sub>O<sub>5</sub>. Scale bar: 200 nm.

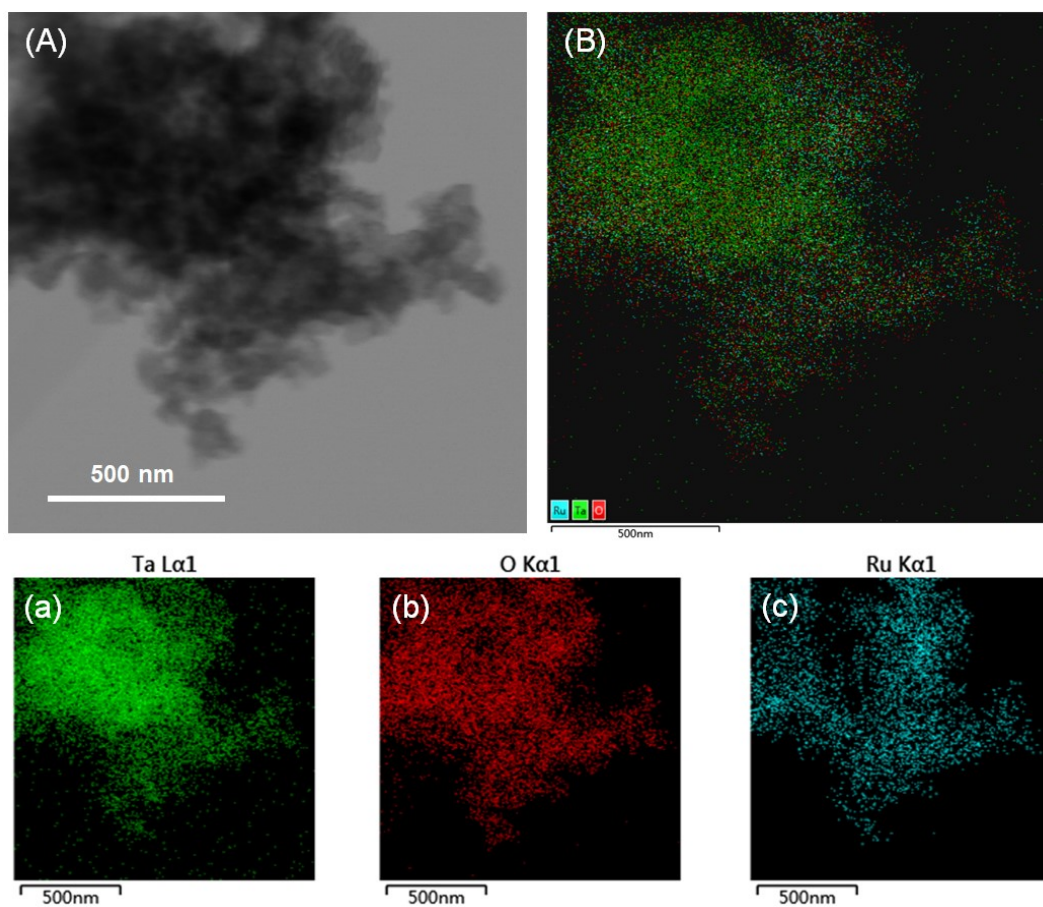

**Fig. S2** (A) TEM image of the selected area to perform EDS. (B) Element mapping image with all elements overlapped. Individual element mapping of (a) Ta, (b) O, and (c) Ru for RuO<sub>x</sub>/Ta<sub>2</sub>O<sub>5</sub>.



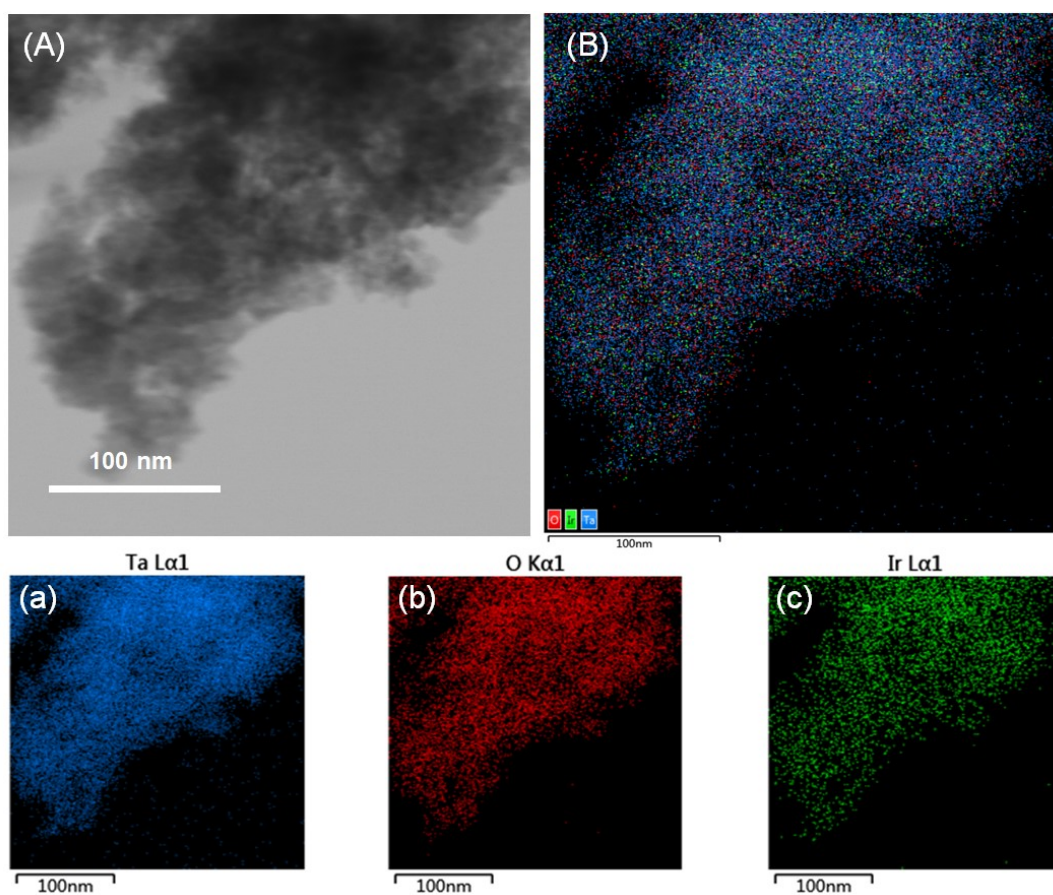

**Fig. S3** (A) TEM image of the selected area to perform EDS. (B) Element mapping image with all elements overlapped. Individual element mapping of (a) Ta, (b) O, and (c) Ir for  $\text{IrO}_x/\text{Ta}_2\text{O}_5$ .

### S3. Surface area and pore structures

**Table S1.** Summary of BET surface area and pore volume of the studied samples.

| Samples                                            | BET surface area<br>(m <sup>2</sup> g <sup>-1</sup> ) | Pore volume<br>(cm <sup>3</sup> g <sup>-1</sup> ) <sup>a</sup> |
|----------------------------------------------------|-------------------------------------------------------|----------------------------------------------------------------|
| IrRuO <sub>x</sub> /Ta <sub>2</sub> O <sub>5</sub> | 98.18                                                 | 0.043                                                          |
| Ta <sub>2</sub> O <sub>5</sub>                     | 231.56                                                | 0.097                                                          |
| Ta <sub>2</sub> O <sub>5</sub> -C                  | 2.92                                                  | 0.001                                                          |

<sup>a</sup> Single point adsorption total pore volume of pores less than 2.0845 nm diameter at P/P<sub>0</sub> = 0.205301818

#### S4. XPS results

**Table S2.** Surface elemental contents determined by XPS and its comparison with EDS.

| Elements | EDS   | XPS  |
|----------|-------|------|
| O        | 69.68 | 74.9 |
| Ru       | 16.45 | 13.7 |
| Ta       | 11.75 | 9.36 |
| Ir       | 2.12  | 2.04 |

**Table S3.** XPS O1s spectral fitting parameters: binding energies (eV) and corresponding functional groups for the studied samples.

| Samples                                            | O 1s                                                       |       |         |                  |            |
|----------------------------------------------------|------------------------------------------------------------|-------|---------|------------------|------------|
|                                                    | $O_L^a$                                                    | M-OH  | $O_V^b$ | H <sub>2</sub> O | $O_{Ad}^c$ |
| Ta <sub>2</sub> O <sub>5</sub> -C                  | 530.0                                                      | --    | 531.1   | 532.1            | 533.2      |
| Ta <sub>2</sub> O <sub>5</sub>                     | 530.1                                                      | --    | 531.0   | 532.0            | 533.3      |
| IrRuO <sub>x</sub> /Ta <sub>2</sub> O <sub>5</sub> | 529.1 (RuO <sub>x</sub> )                                  | 530.2 | 531.0   | 532.0            | 533.3      |
|                                                    | 530.2 (IrO <sub>x</sub> , Ta <sub>2</sub> O <sub>5</sub> ) |       |         |                  |            |
| RuO <sub>2</sub> -C                                | 529.1                                                      | 530.1 | --      | 531.9            | 533.3      |
| IrO <sub>2</sub> -C                                | 530.0                                                      | --    | 531.1   | 531.9            | 533.2      |

<sup>a</sup>  $O_L$  refers to lattice oxygen, <sup>b</sup>  $O_V$  refers to vacant oxygen, and <sup>c</sup>  $O_{Ad}$  refers to adventitious species.



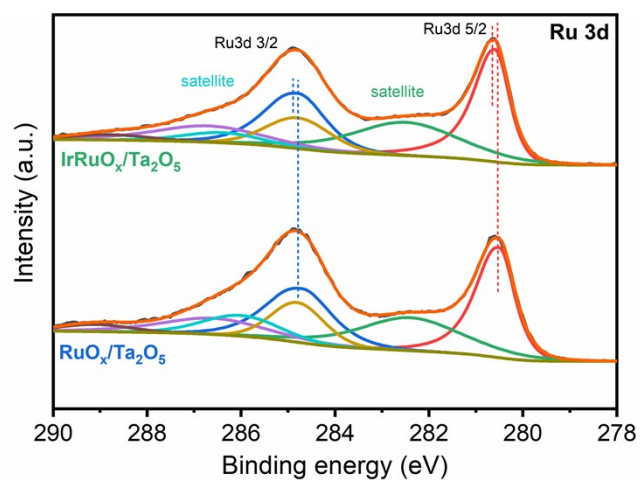

**Fig. S4** XPS deconvoluted Ru 3d for IrRuO<sub>x</sub>/Ta<sub>2</sub>O<sub>5</sub> and RuO<sub>x</sub>/Ta<sub>2</sub>O<sub>5</sub>.

## S6. Double layer capacitance of the studied samples

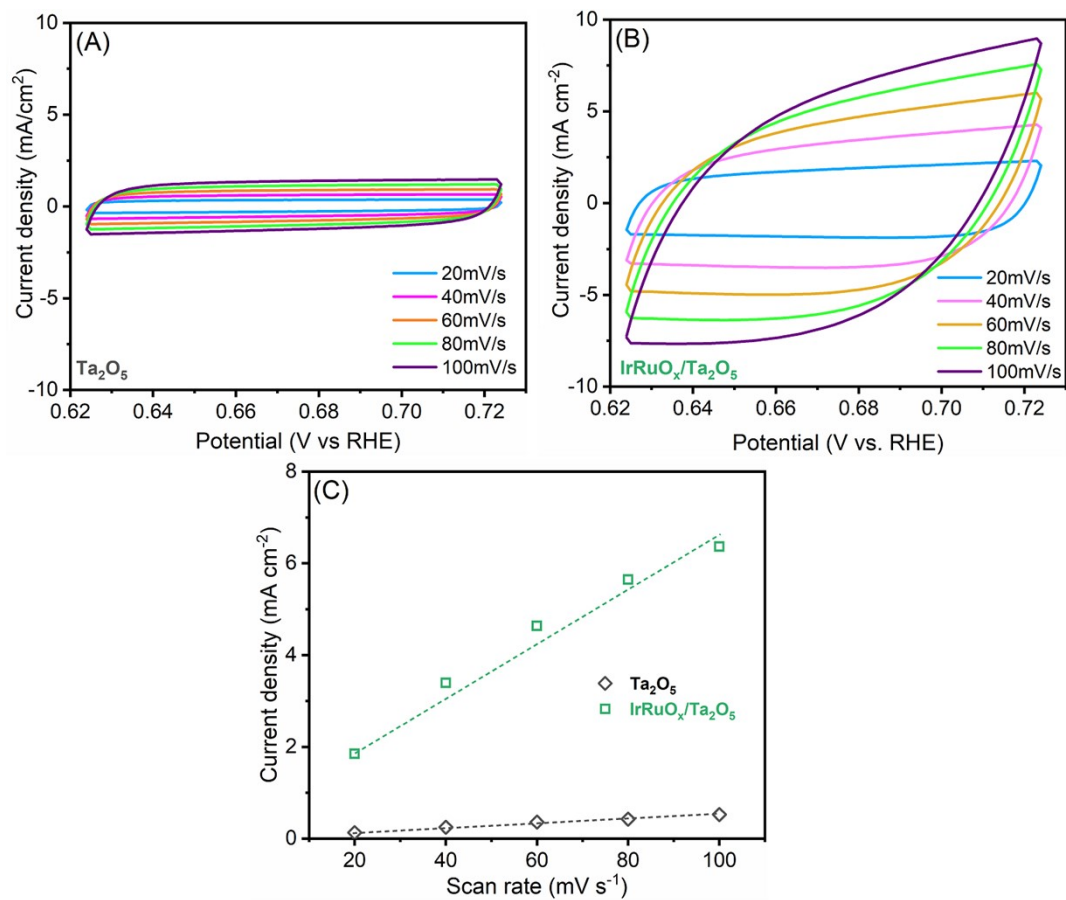

**Fig. S5** CV curves at different scanning speeds for (A) Ta<sub>2</sub>O<sub>5</sub> and (B) IrRuO<sub>x</sub>/Ta<sub>2</sub>O<sub>5</sub>. (C) The double layer capacitance of the two studied samples.

## S7. EXAFS fitting parameters

**Table S4.** EXAFS fitting parameters at the Ta L3-edge for the studied samples.

| Sample                                                 | Shell | $CN^a$  | $R(\text{\AA})^b$ | $\sigma^2(\text{\AA}^2)^c$ | $\Delta E_0(\text{eV})^d$ | $R$ factor |
|--------------------------------------------------------|-------|---------|-------------------|----------------------------|---------------------------|------------|
| Ta foil                                                | Ta-Ta | 8.0*    | 2.85±0.01         | 0.0047                     | 3.3                       | 0.0033     |
|                                                        | Ta-Ta | 6.0*    | 3.29±0.01         | 0.0061                     |                           |            |
| Ta <sub>2</sub> O <sub>5</sub>                         | Ta-O  | 1.2±0.1 | 1.82±0.01         | 0.0018                     | 1.1                       | 0.0022     |
|                                                        | Ta-O  | 5.2±0.1 | 1.99±0.01         | 0.0062                     |                           |            |
|                                                        | Ta-O  | 1.6±0.3 | 3.06±0.01         | 0.0044                     |                           |            |
| IrRuO <sub>x</sub> /<br>Ta <sub>2</sub> O <sub>5</sub> | Ta-O  | 1.7±0.2 | 1.83±0.01         | 0.0026                     | 2.5                       | 0.0044     |
|                                                        | Ta-O  | 4.3±0.2 | 1.98±0.01         | 0.0066                     |                           |            |

<sup>a</sup> $CN$ , coordination number; <sup>b</sup> $R$ , distance between absorber and backscatter atoms; <sup>c</sup> $\sigma^2$ , Debye-Waller factor to account for both thermal and structural disorders; <sup>d</sup> $\Delta E_0$ , inner potential correction;  $R$  factor indicates the goodness of the fit.  $S_0^2$  was fixed to 0.91. A reasonable range of EXAFS fitting parameters:  $0.700 < S_0^2 < 1.000$ ;  $CN > 0$ ;  $\sigma^2 > 0 \text{ \AA}^2$ ;  $|\Delta E_0| < 15 \text{ eV}$ ;  $R \text{ factor} < 0.02$

## S7. PEM water electrolyzer test

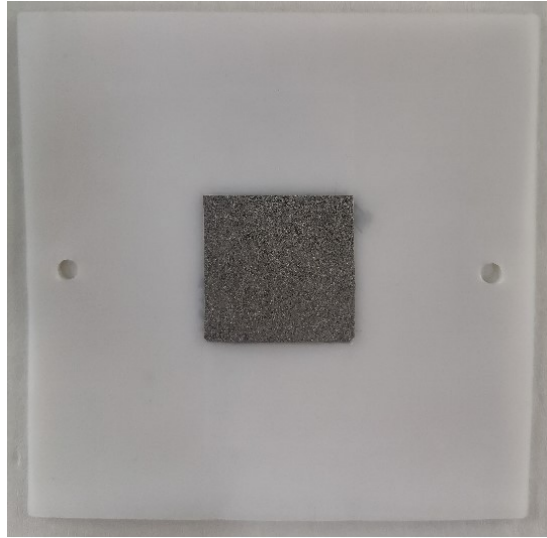

**Fig. S6** A photo of an MEA configuration used in this study.

## S8. OER catalytic performance comparison

**Table S5.** OER catalytic performance comparison between IrRuO<sub>x</sub>/Ta<sub>2</sub>O<sub>5</sub> and other reported Ta-supported Ir catalysts in half cells.

| Catalyst                                                              | Ir loading<br>(mg cm <sup>-2</sup> ) | Overpotential<br>@10mA cm <sup>-2</sup> (mV) | Durability<br>(h)           | Ref. |
|-----------------------------------------------------------------------|--------------------------------------|----------------------------------------------|-----------------------------|------|
| IrRuO <sub>x</sub> /Ta <sub>2</sub> O <sub>5</sub>                    | 0.3                                  | 235                                          | 90 @10mA cm <sup>-2</sup>   | This |
| IrRuO <sub>x</sub> /Ta <sub>2</sub> O <sub>5</sub>                    | 0.03                                 | 284                                          | --                          | work |
| IrO <sub>2</sub> -Ta <sub>2</sub> O <sub>5</sub>                      | --                                   | --                                           | --                          | 1    |
| IrO <sub>2</sub> -Ta <sub>2</sub> O <sub>5</sub> /Ti felf (350)       | ~0.6                                 | 270                                          | 0.5 @1.46V vs. RHE          | 2    |
| Ti/TaO <sub>x</sub> /IrO <sub>2</sub> -Ta <sub>2</sub> O <sub>5</sub> | 0.7 (total cat.)                     | --                                           | --                          | 3    |
| IrO <sub>2</sub> -Ta <sub>2</sub> O <sub>5</sub> /Ti felt(x)-PEG      | 0.4                                  | ~270                                         | 4 @50mA cm <sup>-2</sup>    | 4    |
| Ir/Ta <sub>2</sub> O <sub>5</sub>                                     | --                                   | 245                                          | 200 @100mA cm <sup>-2</sup> | 5    |
| IrO <sub>2</sub> -Ta <sub>2</sub> O <sub>5</sub>                      | 0.03                                 | 315                                          | 2 @10mA cm <sup>-2</sup>    | 6    |
| Ir/Ta <sub>2</sub> O <sub>5</sub>                                     | 0.03                                 | 288                                          | 3 @10mA cm <sup>-2</sup>    | 7    |

## References

1. W. Xu, G. M. Haarberg, S. Sunde, F. Seland, A. P. Ratvik, E. Zimmerman, T. Shimamune, J. Gustavsson and T. Åkre, *Journal of The Electrochemical Society*, 2017, **164**, F895.
2. F. Amano, Y. Furusho and Y.-M. Hwang, *ACS Applied Energy Materials*, 2020, **3**, 4531-4538.
3. Y. Liu, L. Xu, Y. Xin, F. Liu, J. Xuan, M. Guo and T. Duan, *Journal of The Electrochemical Society*, 2022, **169**, 046516.
4. F. Amano, Y. Furusho, S. Yamazoe and M. Yamamoto, *The Journal of Physical Chemistry C*, 2022, **126**, 1817-1827.
5. Y. Qiao, M. Luo, L. Cai, C.-w. Kao, J. Lan, L. Meng, Y.-R. Lu, M. Peng, C. Ma and Y. Tan, *Small*, 2023, **n/a**, 2305479.
6. H. Li, Y. Pan, L. Wu, R. He, Z. Qin, S. Luo, L. Yang and J. Zeng, *International Journal of Hydrogen Energy*, 2023, **48**, 26021-26031.
7. C. Baik, J. Cho, J. I. Cha, Y. Cho, S. S. Jang and C. Pak, *Journal of Power Sources*, 2023, **575**, 233174.
